# Supplementary material
Source: PubMed Central journal article supplement (PMC2685943)
Supplement: dev.024703_7.pdf [file dev.024703_7.pdf]

**Table S1. Largest T-box binding site clusters and their conservation among fish species**

| Gene                                      | Position in gene | Number of T-box sites in given species |      |           |             |        |
|-------------------------------------------|------------------|----------------------------------------|------|-----------|-------------|--------|
|                                           |                  | Zebrafish                              | Fugu | Tetraodon | Stickleback | Medaka |
| <i>hhip</i>                               | Intron 2         | 9                                      | 3    | 3         |             | 2      |
| <i>her7</i>                               | Upstream         | 9                                      |      |           | 1           | 2      |
| <i>efnb2b</i>                             | Upstream         | 8                                      |      | 2         | 2           | 3      |
| <i>hhip</i>                               | Intron 3         | 8                                      |      |           |             |        |
| <i>hhip</i>                               | Intron 11        | 8                                      | 1    | 1         |             | 6      |
| <i>cdx4</i>                               | Upstream         | 8                                      | 4    |           | 7           | 7      |
| <i>pcdh10b</i>                            | Intron 3         | 8                                      | 1    | 4         | 6           | 2      |
| <i>aldh1a2</i>                            | Intron 7         | 8                                      |      |           | 1           | 3      |
| <i>dld</i> (Hans and Campos-Ortega, 2002) | Intron 2         | 7                                      | 7    |           | 6           | 5*     |
| <i>pcdh8</i>                              | Upstream         | 7                                      | 9    | 9         | 9           |        |
| <i>zgc:66052</i>                          | Upstream         | 7                                      | 4    |           | 3           | 1      |
| <i>fbxw4</i>                              | Intron 5         | 7                                      |      |           |             |        |
| <i>aldh1a2</i>                            | Upstream         | 7                                      | 0    |           | 0           | 0      |
| <i>pcdh10b</i>                            | Upstream         | 7                                      | 1    | 3         | 5           | 4      |
| <i>pcdh10b</i>                            | Upstream         | 7                                      | 3    | 3         | 5           | 1      |
| <i>cxcl12b</i>                            | Intron 2         | 7                                      |      |           |             |        |
| <i>mespa</i> (Haraguchi et al., 2001)     | Upstream         | 7                                      | 1    | 3         |             |        |
| <i>tbx6</i> (Szeto and Kimelman, 2004)    | Upstream         | 6                                      |      |           |             |        |

 Region unalignable

 Orthologous region not sequenced

\* Intron not completely sequenced

Binding site scoring matrices identify Spt and Ntl binding motif clusters within putative target non-coding sequence. Loci with the highest number of Spt- and Ntl-binding motifs within a 500 bp window are listed. Each locus was aligned with the orthologous loci from other fish species. The number of T-box motifs found in the region that aligned with the zebrafish T-box cluster is shown (see example for the *dld* gene in Fig. S4). Clusters occurring in previously identified regulatory regions are indicated with a citation next to the gene name. The *dld* T-box site cluster is part of a 2.8 kb region known to drive gene expression in the tail bud (Hans and Campos-Ortega, 2002). The *mespa* T-box site cluster aligns with part of an early mesoderm regulatory element upstream of mouse *Mesp1* (Haraguchi et al., 2001). The *tbx6* T-box site cluster is part of an early mesoderm regulatory element (Szeto and Kimelman, 2004).

#### References

- Hans, S. and Campos-Ortega, J. A. (2002). On the organization of the regulatory region of the zebrafish *deltaD* gene. *Development* **129**, 4773-4784.
- Haraguchi, S., Kitajima, S., Takagi, A., Takeda, H., Inoue, T. and Saga, Y. (2001). Transcriptional regulation of *Mesp1* and *Mesp2* genes: differential usage of enhancers during development. *Mech. Dev.* **108**, 59-69.
- Szeto, D. P. and Kimelman, D. (2004). Combinatorial gene regulation by BMP and Wnt in zebrafish posterior mesoderm formation. *Development* **131**, 3751-3760.
