# Supplementary material
Source: PubMed Central journal article supplement (PMC2685943)

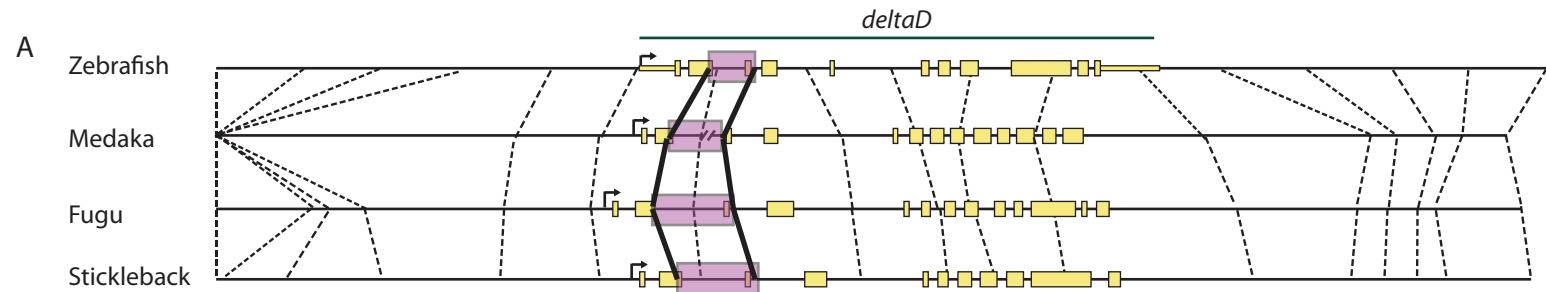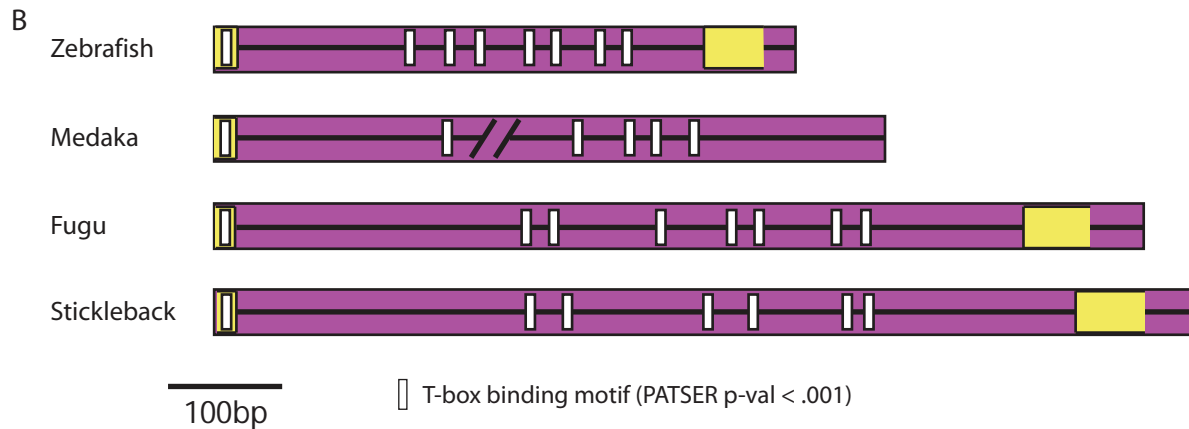

Supplement: dev.024703_4.pdf [file dev.024703_4.pdf]
